# Supplementary material for: Effects of dietary supplementation of fish oil plus vitamin D3 on gut microbiota and fecal metabolites, and their correlation with nonalcoholic fatty liver disease risk factors: a randomized controlled trial
Source: Royal Society of Chemistry journal article supplement (doi:10.1039/d3fo02319b), 2024-01-01
Supplement: d3fo02319b1.pdf [file d3fo02319b1.pdf]

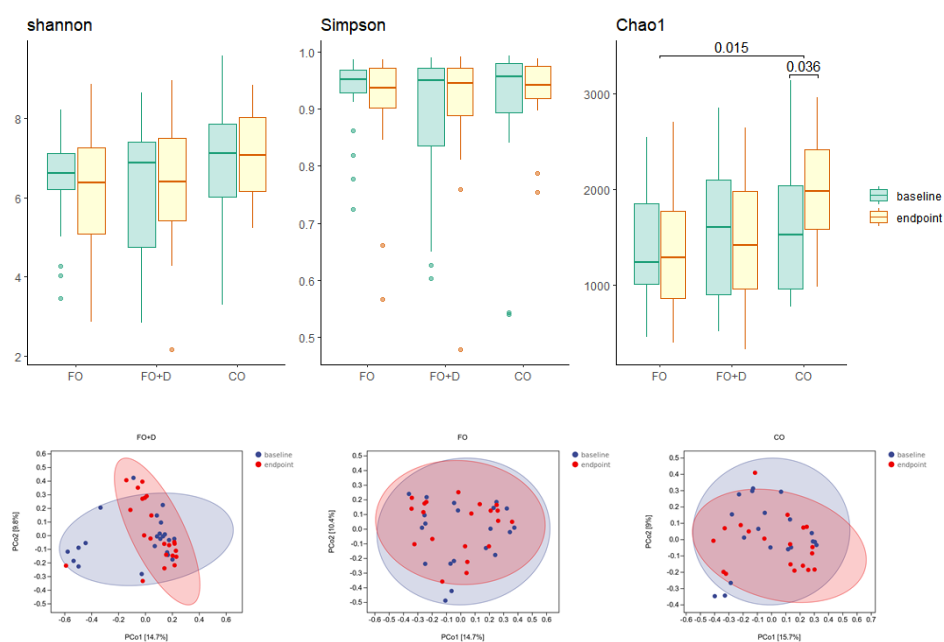

Supplementary Figure 1. The changes of microbial community richness, diversity and OTU level of three group after intervention.

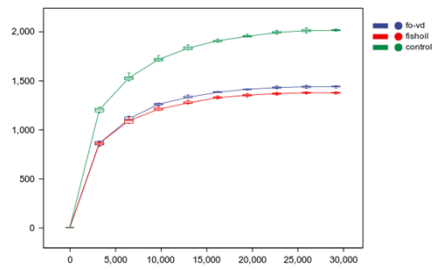

A

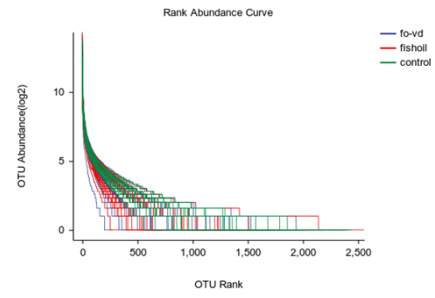

B

Supple

mentary Figure 2. Dilution curve (A) and rank abundance curve (B); fo-vd: fish oil plus vitamin D<sub>3</sub>; fo: fish oil.

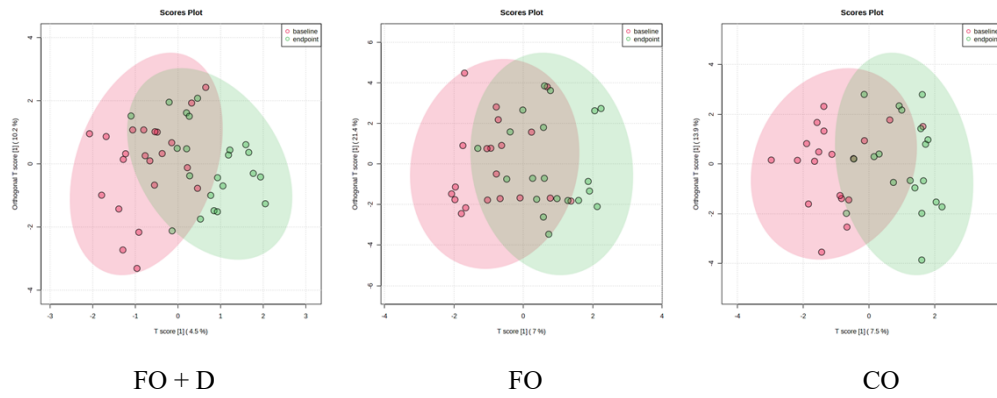

Supplementary Figure 3. OPLS-DA score plots comparing of the gut microbiota before and after the intervention in each group.

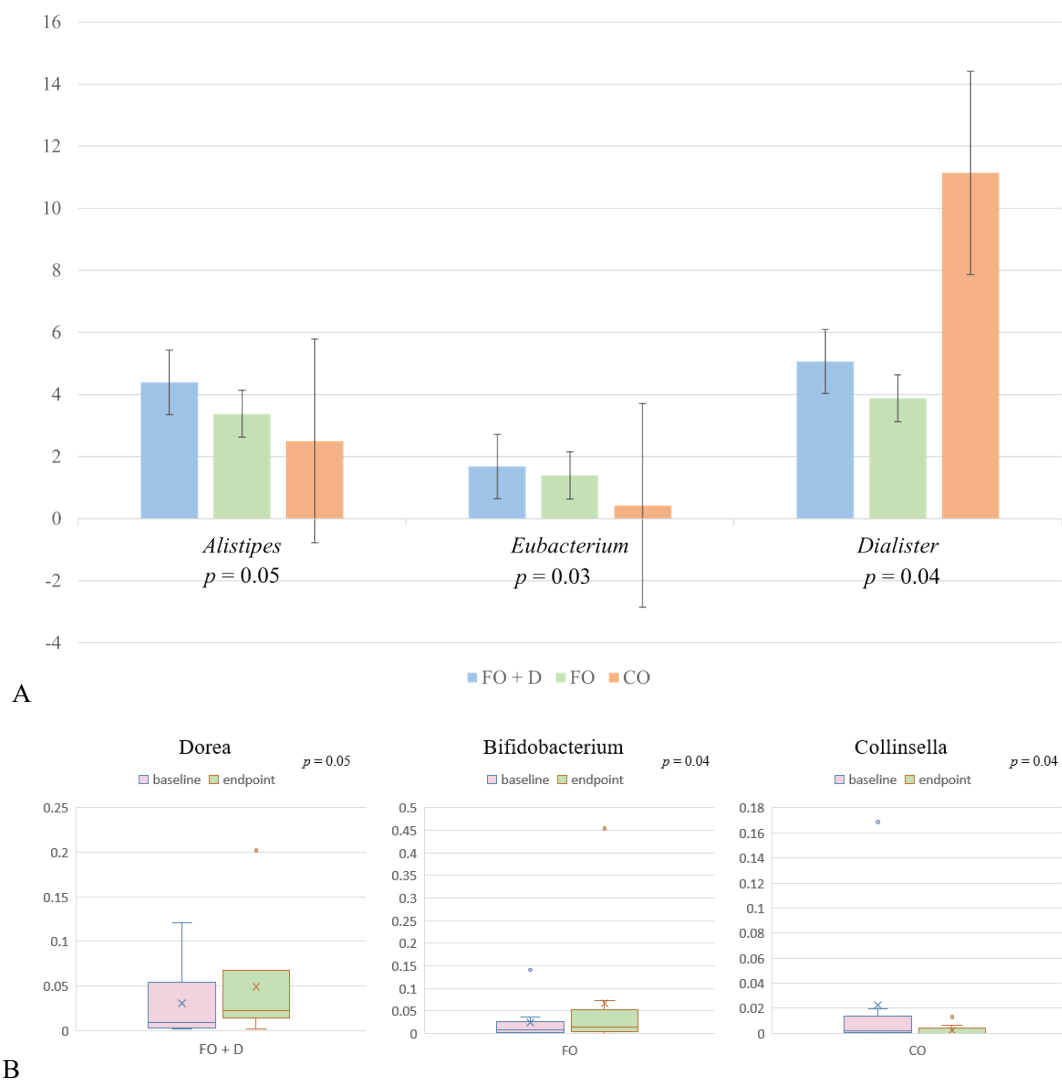

Supplementary Figure 4. A: Changes of gut microbiota among three groups; B: Changes of gut microbiota before and after intervention.

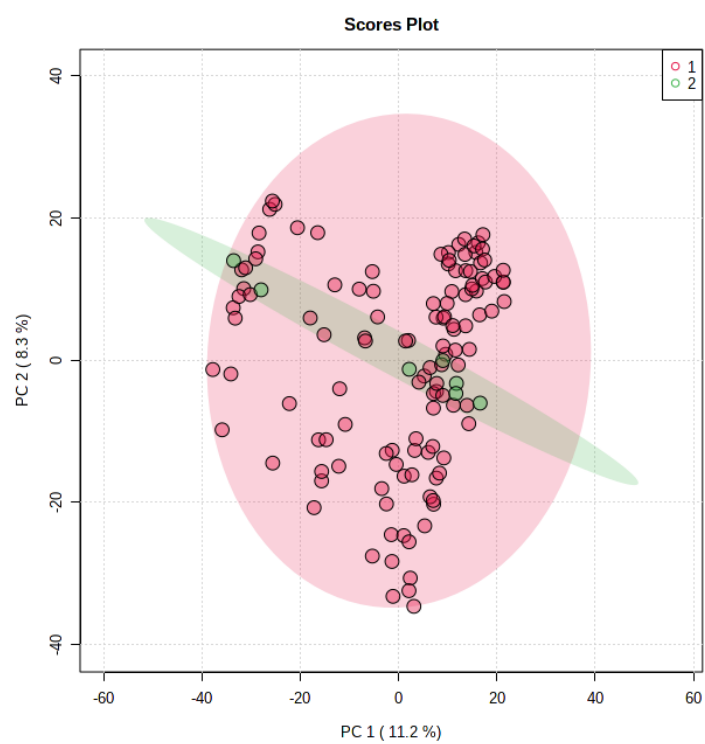

Supplementary Figure 5. PCA results of the sample and QC; 1 for all sample, 2 for quality control (QC).

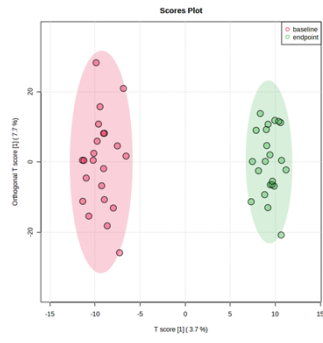

FO + D

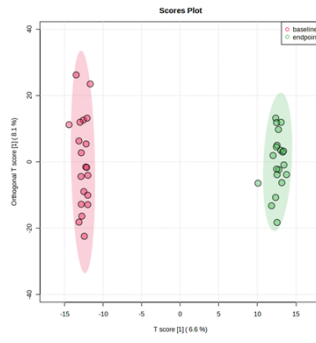

FO

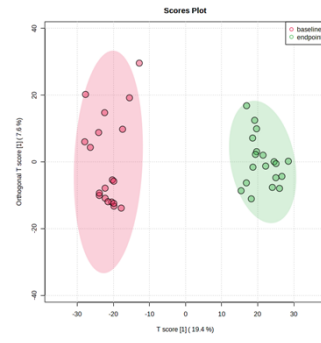

CO

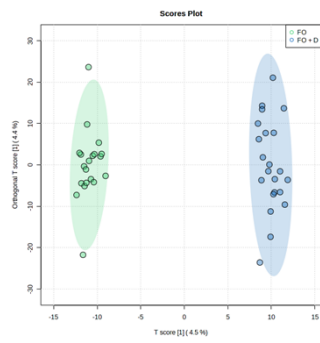

FO + D vs FO

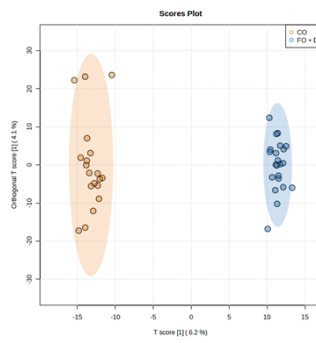

FO + D vs CO

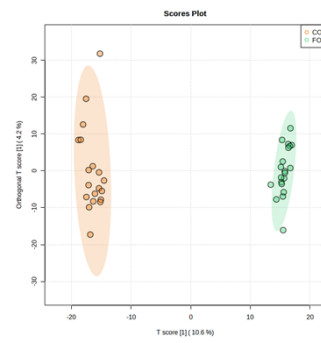

FO vs CO

Supplementary Figure 6. OPLS-DA score plots comparing the fecal metabolites before and after the intervention in each group and the difference between two groups.

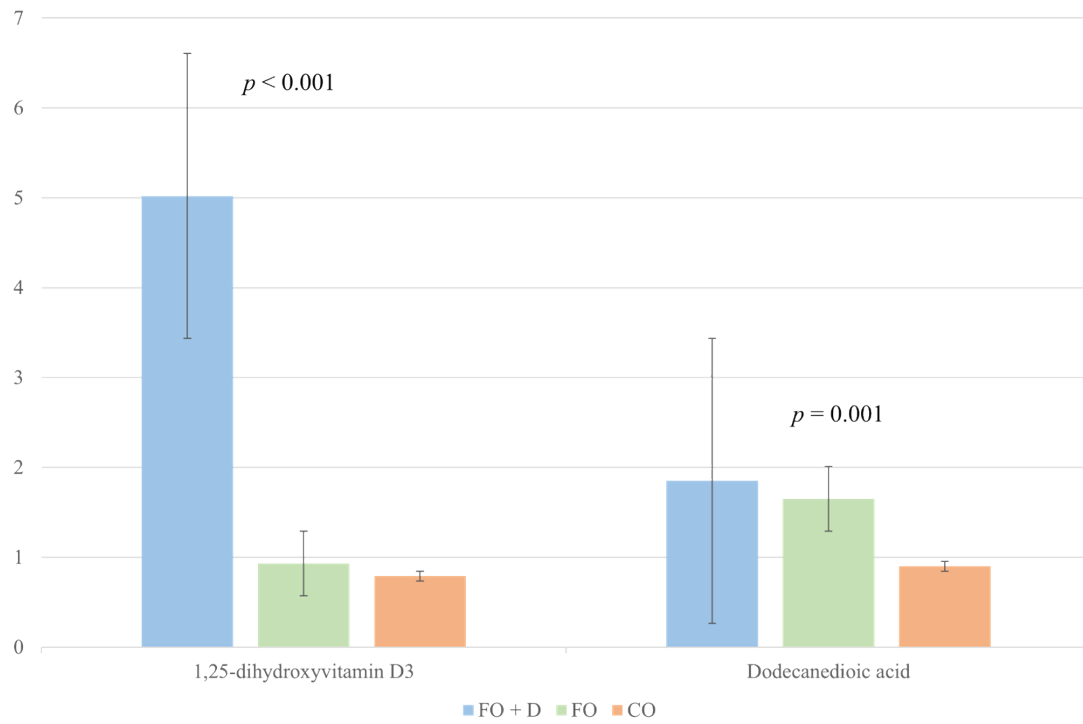

Supplementary Figure 7. Changes of fecal metabolites among three groups.
