# Supplementary material for: Effects of dietary supplementation of fish oil plus vitamin D3 on gut microbiota and fecal metabolites, and their correlation with nonalcoholic fatty liver disease risk factors: a randomized controlled trial
Source: Royal Society of Chemistry journal article supplement (doi:10.1039/d3fo02319b), 2024-01-01
Supplement: d3fo02319b2.pdf [file d3fo02319b2.pdf]

| Fatty acid | Corn oil (%) | Fish oil (%) |
|------------|--------------|--------------|
| C16:1      | 10.433       | 0.121        |
| C18:0      | 3.354        | 0.032        |
| C18:1      | 18.403       | 0.492        |
| C18:2      | 56.753       | 1.625        |
| C18:3n-6   | 9.692        | 0.170        |
| C20:3n-6   | -            | 3.452        |
| C20:5n-3   | 0.082        | 52.579       |
| C22:6n-3   | 0.047        | 25.720       |

1 Supplementary Table 1. Fatty acid composition of different interventions.

2

| Variable                           |                       | FOD                                  |                  | <i>p<sup>a</sup></i> |                  | FO               |                  | <i>p<sup>a</sup></i> |                   | CO                |                   | <i>p<sup>a</sup></i>       |  | <i>p<sup>b</sup></i>                                  |  |                                                       | <i>P<sup>c</sup></i> |  |                   |
|------------------------------------|-----------------------|--------------------------------------|------------------|----------------------|------------------|------------------|------------------|----------------------|-------------------|-------------------|-------------------|----------------------------|--|-------------------------------------------------------|--|-------------------------------------------------------|----------------------|--|-------------------|
|                                    |                       |                                      |                  |                      |                  |                  |                  |                      |                   |                   |                   | FO +D<br>vs FO vs CO vs CO |  |                                                       |  |                                                       |                      |  |                   |
| Demographic factors                |                       |                                      |                  |                      |                  |                  |                  |                      |                   |                   |                   |                            |  |                                                       |  |                                                       |                      |  |                   |
| No. of subjects                    |                       | 22                                   |                  |                      |                  | 20               |                  |                      |                   | 19                |                   |                            |  |                                                       |  |                                                       |                      |  |                   |
| Age (years)                        |                       | 56.41 ± 15.84                        |                  |                      |                  | 54.25± 15.32     |                  |                      |                   | 58.42 ± 13.74     |                   |                            |  | 0.80 0.84 0.61                                        |  |                                                       | 0.69                 |  |                   |
| Gender                             | Male                  | 11                                   | 50% <sup>d</sup> | 12                   | 60% <sup>d</sup> | 11               | 58% <sup>d</sup> | 0.52 <sup>c</sup>    | 0.61 <sup>c</sup> | 0.89 <sup>c</sup> | 0.78 <sup>c</sup> |                            |  |                                                       |  |                                                       |                      |  |                   |
|                                    | Female                | 11                                   | 50% <sup>d</sup> | 8                    | 40% <sup>d</sup> | 8                | 42% <sup>d</sup> |                      |                   |                   |                   |                            |  |                                                       |  |                                                       |                      |  |                   |
| Smoker                             |                       | 6                                    |                  | 27% <sup>d</sup>     |                  | 4                |                  | 20% <sup>d</sup>     |                   | 7                 |                   | 37% <sup>d</sup>           |  | 0.58 <sup>c</sup> 0.51 <sup>c</sup> 0.24 <sup>c</sup> |  |                                                       | 0.50 <sup>c</sup>    |  |                   |
| Drinker                            |                       | <140g for male or<br><70g for female |                  | 4                    |                  | 18% <sup>d</sup> |                  | 4                    |                   | 20% <sup>d</sup>  |                   | 5                          |  | 26% <sup>d</sup>                                      |  | 0.88 <sup>c</sup> 0.53 <sup>c</sup> 0.64 <sup>c</sup> |                      |  | 0.80 <sup>c</sup> |
| Prevalence                         | Hypertension          | 3                                    | 14% <sup>d</sup> | 4                    | 20% <sup>d</sup> | 3                | 16% <sup>d</sup> | 0.58 <sup>c</sup>    | 0.85 <sup>c</sup> | 0.73 <sup>c</sup> | 0.85 <sup>c</sup> |                            |  |                                                       |  |                                                       |                      |  |                   |
|                                    | Diabetes              | 2                                    | 9% <sup>d</sup>  | 3                    | 15% <sup>d</sup> | 2                | 11% <sup>d</sup> | 0.56 <sup>c</sup>    | 0.88 <sup>c</sup> | 0.68 <sup>c</sup> | 0.83 <sup>c</sup> |                            |  |                                                       |  |                                                       |                      |  |                   |
|                                    | Hyperlipidemia        | 3                                    | 14% <sup>d</sup> | 9                    | 45% <sup>d</sup> | 5                | 26% <sup>d</sup> | 0.06 <sup>c</sup>    | 0.53 <sup>c</sup> | 0.22 <sup>c</sup> | 0.15 <sup>c</sup> |                            |  |                                                       |  |                                                       |                      |  |                   |
| Current medical<br>treatment n (%) | Hypotensive<br>drugs  | 3                                    | 14% <sup>d</sup> | 3                    | 12% <sup>d</sup> | 3                | 16% <sup>d</sup> | 0.74 <sup>c</sup>    | 0.93 <sup>c</sup> | 0.81 <sup>c</sup> | 0.94 <sup>c</sup> |                            |  |                                                       |  |                                                       |                      |  |                   |
|                                    | Hypoglycemic<br>drugs | 1                                    | 5% <sup>d</sup>  | 3                    | 12% <sup>d</sup> | 1                | 5% <sup>d</sup>  | 0.32 <sup>c</sup>    | 0.96 <sup>c</sup> | 0.35 <sup>c</sup> | 0.48 <sup>c</sup> |                            |  |                                                       |  |                                                       |                      |  |                   |
|                                    | Lipid-lowing<br>drugs | 3                                    | 14% <sup>d</sup> | 5                    | 25% <sup>d</sup> | 5                | 26% <sup>d</sup> | 0.48 <sup>c</sup>    | 0.35 <sup>c</sup> | 0.81 <sup>c</sup> | 0.64 <sup>c</sup> |                            |  |                                                       |  |                                                       |                      |  |                   |
| Anthropometric<br>measurement      |                       |                                      |                  |                      |                  |                  |                  |                      |                   |                   |                   |                            |  |                                                       |  |                                                       |                      |  |                   |
| Height (cm)                        |                       | 165.16 ± 8.83                        |                  |                      |                  | 166.58 ± 11.85   |                  |                      |                   | 168.74 ± 9.07     |                   |                            |  | 0.34 0.23 0.68                                        |  |                                                       | 0.25                 |  |                   |
| Weight (kg)                        | Day 0                 | 71.88 ± 10.29                        | 0.96             | 75.34 ± 11.99        | 0.68             | 75.60 ± 12.12    | 0.92             | 0.30                 | 0.27              | 0.74              | 0.29              |                            |  |                                                       |  |                                                       |                      |  |                   |
|                                    | Day 90                | 71.96 ± 10.49                        |                  | 76.24 ± 12.20        |                  | 76.12 ± 13.19    |                  | 0.25                 | 0.28              | 0.99              | 0.25              |                            |  |                                                       |  |                                                       |                      |  |                   |
|                                    | Changes               | 0.08 ± 1.77                          |                  | 0.90 ± 1.79          |                  | 0.52 ± 2.80      |                  | 0.21                 | 0.37              | 0.88              | 0.48              |                            |  |                                                       |  |                                                       |                      |  |                   |

|                          |         |                |      |               |      |               |      |       |      |      |      |
|--------------------------|---------|----------------|------|---------------|------|---------------|------|-------|------|------|------|
| BMI (kg/m <sup>2</sup> ) | Day 0   | 26.27 ± 2.44   | 0.85 | 27.46 ± 4.62  | 0.68 | 26.41 ± 2.39  | 0.85 | 0.79  | 0.88 | 0.78 | 0.86 |
|                          | Day 90  | 26.34 ± 2.66   |      | 27.24 ± 3.41  |      | 26.58 ± 2.75  |      | 0.55  | 0.88 | 0.67 | 0.76 |
|                          | Changes | 0.07 ± 0.65    |      | -0.22 ± 2.07  |      | 0.17 ± 0.89   |      | 0.50  | 0.43 | 0.80 | 0.83 |
| Biochemical indicators   |         |                |      |               |      |               |      |       |      |      |      |
| TAG                      | Day 0   | 1.63 ± 0.67    | 0.05 | 2.68 ± 1.35   | 0.03 | 1.73 ± 0.67   | 0.24 | 0.10  | 0.69 | 0.10 | 0.65 |
|                          | Day 90  | 1.32 ± 0.71    |      | 1.78 ± 0.62   |      | 1.75 ± 1.38   |      | 0.001 | 0.34 | 0.06 | 0.14 |
|                          | Changes | -0.45 ± 0.63   |      | -0.90 ± 0.95  |      | 0.02 ± 1.01   |      | 0.16  | 0.28 | 0.01 | 0.12 |
| TC                       | Day 0   | 5.33 ± 1.20    | 0.70 | 4.83 ± 1.07   | 0.55 | 5.06 ± 0.93   | 0.63 | 0.17  | 0.49 | 0.62 | 0.41 |
|                          | Day 90  | 5.30 ± 1.22    |      | 4.62 ± 1.03   |      | 5.14 ± 0.83   |      | 0.07  | 0.91 | 0.07 | 0.57 |
|                          | Changes | -0.03 ± 0.98   |      | -0.21 ± 0.84  |      | 0.08 ± 0.54   |      | 0.70  | 0.61 | 0.28 | 0.72 |
| ALT (U/L)                | Day 0   | 26.86 ± 14.04  | 0.12 | 25.25 ± 12.24 | 0.21 | 30.68 ± 30.55 | 0.42 | 1.00  | 0.78 | 0.64 | 0.56 |
|                          | Day 90  | 20.09 ± 8.09   |      | 22.65 ± 12.31 |      | 30.21 ± 30.64 |      | 0.85  | 0.68 | 0.98 | 0.09 |
|                          | Changes | -6.77 ± 10.58  |      | -2.60 ± 9.72  |      | -0.47 ± 5.80  |      | 0.19  | 0.01 | 0.40 | 0.02 |
| AST (U/L)                | Day 0   | 22.82 ± 7.90   | 0.29 | 21.80 ± 4.92  | 0.67 | 22.58 ± 8.91  | 0.86 | 0.71  | 0.86 | 0.59 | 0.90 |
|                          | Day 90  | 19.77 ± 4.07   |      | 21.40 ± 5.33  |      | 23.37 ± 9.69  |      | 0.28  | 0.29 | 0.80 | 0.08 |
|                          | Changes | -3.05 ± 6.20   |      | -0.40 ± 4.64  |      | 0.79 ± 3.61   |      | 0.38  | 0.01 | 0.28 | 0.01 |
| GGT (U/L)                | Day 0   | 34.95 ± 36.06  | 0.23 | 27.30 ± 19.19 | 0.88 | 29.84 ± 20.84 | 0.77 | 0.47  | 0.80 | 0.44 | 0.52 |
|                          | Day 90  | 23.18 ± 10.73  |      | 23.65 ± 12.19 |      | 30.89 ± 25.78 |      | 0.97  | 0.35 | 0.49 | 0.16 |
|                          | Changes | -11.77 ± 33.87 |      | -3.65 ± 10.35 |      | 1.05 ± 8.97   |      | 0.14  | 0.02 | 0.37 | 0.06 |
| HDL-C                    | Day 0   | 1.24 ± 0.27    | 0.34 | 1.04 ± 0.24   | 0.69 | 1.23 ± 0.39   | 0.94 | 0.20  | 0.67 | 0.14 | 0.83 |
|                          | Day 90  | 1.20 ± 0.33    |      | 1.29 ± 0.29   |      | 1.07 ± 0.27   |      | 0.01  | 0.49 | 0.11 | 0.59 |
|                          | Changes | 0.05 ± 0.12    |      | 0.03 ± 0.17   |      | 0.17 ± 0.16   |      | 0.80  | 0.35 | 0.63 | 0.44 |
| LDL-C                    | Day 0   | 3.67 ± 1.09    | 0.68 | 2.85 ± 1.06   | 0.78 | 3.36 ± 0.83   | 0.82 | 0.10  | 0.27 | 0.06 | 0.31 |
|                          | Day 90  | 3.67 ± 1.10    |      | 2.90 ± 0.95   |      | 3.46 ± 0.79   |      | 0.01  | 0.70 | 0.04 | 0.43 |
|                          | Changes | 0.01 ± 0.66    |      | 0.05 ± 0.98   |      | 0.09 ± 0.62   |      | 0.64  | 0.75 | 0.86 | 0.72 |
| Insulin (mmol/L)         | Day 0   | 13.24 ± 2.99   | 0.02 | 13.53 ± 2.05  | 0.07 | 13.60 ± 2.53  | 0.53 | 0.23  | 0.45 | 0.97 | 0.65 |

|                    |         |                |      |                 |      |                |      |      |        |       |        |
|--------------------|---------|----------------|------|-----------------|------|----------------|------|------|--------|-------|--------|
|                    | Day 90  | 11.54± 1.61    |      | 12.64 ± 2.61    |      | 13.08 ± 2.25   |      | 0.20 | 0.02   | 0.34  | 0.02   |
|                    | Changes | -1.70 ± 2.04   |      | -0.8 9± 2.48    |      | -0.52 ± 1.67   |      | 0.38 | 0.03   | 0.31  | 0.07   |
| Glucose            | Day 0   | 6.31 ± 2.05    | 0.57 | 5.76 ± 1.20     | 0.10 | 6.18 ± 1.33    | 0.57 | 0.27 | 0.63   | 0.24  | 0.76   |
|                    | Day 90  | 6.40 ± 1.98    |      | 6.13 ± 1.27     |      | 6.34 ± 1.00    |      | 0.81 | 0.24   | 0.23  | 0.29   |
|                    | Changes | 0.09 ± 0.61    |      | 0.38 ± 0.43     |      | 0.16 ± 0.79    |      | 0.12 | 0.35   | 0.82  | 0.65   |
| HOMA-IR            | Day 0   | 3.68 ± 1.26    | 0.37 | 3.51 ± 1.13     | 0.91 | 3.71± 0.88     | 0.65 | 0.76 | 0.57   | 0.34  | 0.95   |
|                    | Day 90  | 3.27 ± 1.02    |      | 3.42 ± 0.84     |      | 3.67 ± 0.72    |      | 0.41 | 0.04   | 0.16  | 0.15   |
|                    | Changes | -0.41 ± 0.70   |      | -0.10 ± 0.84    |      | -0.04 ± 0.59   |      | 0.16 | 0.12   | 0.89  | 0.10   |
| BUN, µmol/L        | Day 0   | 5.16 ± 0.79    | 0.93 | 4.87 ± 1.14     | 0.68 | 5.34 ± 0.76    | 0.94 | 0.31 | 0.43   | 0.16  | 0.58   |
|                    | Day 90  | 5.24 ± 1.03    |      | 5.10 ± 1.20     |      | 5.48 ± 0.89    |      | 0.55 | 0.42   | 0.18  | 0.75   |
|                    | Changes | 0.08 ± 1.02    |      | 0.23 ± 0.75     |      | 0.15 ± 1.00    |      | 0.75 | 0.93   | 0.48  | 0.79   |
| Creatinine, µmol/L | Day 0   | 68.95 ± 13.81  | 0.72 | 70.50 ± 11.64   | 0.57 | 70.79 ± 9.99   | 0.79 | 0.73 | 0.63   | 0.77  | 0.62   |
|                    | Day 90  | 70.23 ± 12.22  |      | 72.70 ± 12.06   |      | 71.32 ± 10.97  |      | 0.41 | 0.67   | 0.82  | 0.75   |
|                    | Changes | 1.27 ± 6.10    |      | 2.20 ± 6.68     |      | 0.53 ± 6.27    |      | 0.56 | 0.68   | 0.41  | 0.73   |
| Urea acid, µmol/L  | Day 0   | 358.90 ± 86.69 | 0.58 | 401.15 ± 103.66 | 0.37 | 360.11 ± 91.83 | 0.77 | 0.26 | 0.90   | 0.36  | 0.92   |
|                    | Day 90  | 384.64 ± 80.98 |      | 370.15 ± 109.80 |      | 363.16 ± 86.98 |      | 0.40 | 0.49   | 0.96  | 0.48   |
|                    | Changes | -15.00 ± 56.85 |      | -31 ± 90.98     |      | 3.05 ± 40.15   |      | 0.79 | 0.48   | 0.19  | 0.41   |
| Adiponectin        | Day 0   | 4.28 ± 2.80    | 0.15 | 3.35 ± 1.95     | 0.07 | 4.16 ± 2.25    | 0.37 | 0.36 | 0.88   | 0.22  | 0.83   |
|                    | Day 90  | 6.00 ± 4.35    |      | 4.57 ± 2.31     |      | 4.79 ± 2.56    |      | 0.42 | 0.51   | 0.80  | 0.22   |
|                    | Changes | 1.73 ± 2.99    |      | 1.22 ± 1.55     |      | 0.63 ± 2.27    |      | 0.84 | 0.07   | 0.07  | 0.14   |
| IL-1β(ng/L)        | Day 0   | 23.62 ± 33.59  | 0.31 | 24.04 ± 31.22   | 0.14 | 18.17 ± 13.27  | 0.10 | 0.83 | 0.86   | 0.80  | 0.54   |
|                    | Day 90  | 24.04 ± 28.11  |      | 18.61 ± 24.63   |      | 14 .16 17.94   |      | 0.29 | 0.15   | 0.38  | 0.36   |
|                    | Changes | -7.08 ± 7.56   |      | -4.97 ± 6.08    |      | 1.28 ± 6.35    |      | 0.35 | <0.001 | <0.05 | <0.001 |
| IL-6 (ng/L)        | Day 0   | 9.16 ± 11.61   | 0.94 | 6.13 ± 6.85     | 0.05 | 5.02± 5.04     | 0.23 | 0.23 | 0.11   | 0.69  | 0.11   |
|                    | Day 90  | 8.85 ± 10.99   |      | 7.25 ± 6.00     |      | 6.12 ± 4.74    |      | 0.64 | 0.66   | 0.42  | 0.27   |
|                    | Changes | -0.31± 1.92    |      | 1.12 ± 1.93     |      | 1.11 ± 2.82    |      | 0.02 | 0.07   | 0.69  | 0.04   |

|                      |         |                      |       |                      |      |                     |      |      |        |       |        |
|----------------------|---------|----------------------|-------|----------------------|------|---------------------|------|------|--------|-------|--------|
| TNF- $\alpha$ (ng/L) | Day 0   | 447.83 $\pm$ 393.24  | 0.001 | 362.66 $\pm$ 335.56  | 0.01 | 327.36 $\pm$ 237.11 | 0.29 | 0.27 | 0.30   | 0.87  | 0.24   |
|                      | Day 90  | 265.18 $\pm$ 439.22  |       | 219.14 $\pm$ 278.15  |      | 179.76 $\pm$ 197.12 |      | 0.95 | 0.93   | 0.68  | 0.40   |
|                      | Changes | -173.56 $\pm$ 102.26 |       | -113.52 $\pm$ 157.65 |      | -21.29 $\pm$ 102.13 |      | 0.27 | <0.001 | 0.001 | <0.001 |
| FGF-21 (pg/ml)       | Day 0   | 107.62 $\pm$ 64.74   | 0.44  | 114.36 $\pm$ 62.83   | 0.81 | 99.12 $\pm$ 67.25   | 0.57 | 0.71 | 0.61   | 0.35  | 0.69   |
|                      | Day 90  | 92.89 $\pm$ 59.08    |       | 109.40 $\pm$ 52.72   |      | 111.72 $\pm$ 74.14  |      | 0.31 | 0.43   | 0.76  | 0.32   |
|                      | Changes | -14.73 $\pm$ 28.051  |       | -4.96 $\pm$ 26.50    |      | 12.60 $\pm$ 26.19   |      | 0.42 | 0.01   | 0.06  | 0.001  |
| Nutrition intake     |         |                      |       |                      |      |                     |      |      |        |       |        |
| Carbohydrate, g      | Day 0   | 228.31 $\pm$ 60.21   | 0.80  | 329.75 $\pm$ 137.77  | 0.13 | 265.50 $\pm$ 99.51  | 0.69 | 0.10 | 0.33   | 0.20  | 0.34   |
|                      | Day 90  | 269.78 $\pm$ 148.52  |       | 258.95 $\pm$ 80.63   |      | 263.14 $\pm$ 124.33 |      | 0.63 | 0.93   | 0.67  | 0.86   |
|                      | Changes | 72.68 $\pm$ 160.60   |       | -62.95 $\pm$ 117.56  |      | 10.63 $\pm$ 136.73  |      | 0.20 | 0.32   | 0.13  | 0.26   |
| Fat, kcal            | Day 0   | 83.03 $\pm$ 36.71    | 0.44  | 93.80 $\pm$ 27.46    | 0.75 | 85.52 $\pm$ 27.95   | 0.51 | 0.27 | 1.00   | 0.27  | 0.82   |
|                      | Day 90  | 97.84 $\pm$ 58.86    |       | 102.19 $\pm$ 19.70   |      | 93.38 $\pm$ 38.67   |      | 0.41 | 0.88   | 0.84  | 0.78   |
|                      | Changes | 23.68 $\pm$ 38.93    |       | 13.61 $\pm$ 52.95    |      | 13.36 $\pm$ 40.35   |      | 0.69 | 0.48   | 0.74  | 0.52   |
| Protein, kcal        | Day 0   | 75.29 $\pm$ 32.73    | 0.84  | 88.27 $\pm$ 37.24    | 0.83 | 85.82 $\pm$ 23.78   | 0.43 | 0.41 | 0.39   | 0.82  | 0.35   |
|                      | Day 90  | 90.30 $\pm$ 66.29    |       | 85.28 $\pm$ 36.78    |      | 80.51 $\pm$ 30.49   |      | 0.93 | 0.91   | 0.86  | 0.52   |
|                      | Changes | 29.30 $\pm$ 64.49    |       | -0.05 $\pm$ 32.18    |      | -1.81 $\pm$ 29.95   |      | 0.16 | 0.06   | 0.65  | 0.06   |

4 Supplementary Table 2 Characteristics of subjects according to NAFLD.

5  $P^a$  is for the differences between the baseline and endpoint of intervention by a paired Wilcoxon rank sum test;  $P^b$  is for the differences between two groups by Wilcoxon rank  
6 sum test;  $P^c$  is for the differences between three groups by a generalized linear model; <sup>d</sup>: percentages was used to express the category variables; <sup>e</sup>: is for the differences between  
7 gender by chi-square test. Abbreviations: ALT: alanine transaminase; AST: aspartate aminotransferase; BMI: body mass index; BUN: blood urea nitrogen; FGF21: fibroblast  
8 growth factor 21; GGT: gamma-glutamyl transpeptidase; HDL-C: high-density lipoprotein cholesterol; LDL-C: low-density lipoprotein cholesterol; IL-1 $\beta$ , interleukin-1 $\beta$ ; IL-  
9 6, interleukin-6; TAG: triacylglycerol; TC: total cholesterol; TNF- $\alpha$ : tumor necrosis factor- $\alpha$ .

11

|                 | Detected<br>mass (m/z) | Retention<br>time (min) | Formula                                           | Putative identification                  | FC    | <i>p</i> |
|-----------------|------------------------|-------------------------|---------------------------------------------------|------------------------------------------|-------|----------|
| FOD vs FO       | 453.33180              | 5.216                   | C <sub>27</sub> H <sub>44</sub> O <sub>3</sub>    | 1,25-dihydroxyvitamin D <sub>3</sub>     | 5.42  | <0.001   |
|                 | 357.26750              | 9.235                   | C <sub>24</sub> H <sub>36</sub> O <sub>2</sub>    | THA (C24:6, n-3)                         | 2.05  | 0.03     |
| FOD vs CO       | 433.29160              | 10.357                  | C <sub>27</sub> H <sub>44</sub> O <sub>4</sub>    | 1,24,25-trihydroxyvitamin D <sub>3</sub> | 7.70  | <0.001   |
|                 | 339.21470              | 12.082                  | C <sub>20</sub> H <sub>34</sub> O <sub>4</sub>    | 8,9-DiHETrE                              | 0.05  | <0.05    |
| FO vs CO        | 462.33430              | 4.529                   | C <sub>52</sub> H <sub>91</sub> O <sub>11</sub> P | PG (22:6-OH (17)/i-24:0)                 | 0.003 | <0.001   |
| FOD vs FO vs CO | 453.33180              | 5.216                   | C <sub>27</sub> H <sub>44</sub> O <sub>3</sub>    | 1,25-dihydroxyvitamin D <sub>3</sub>     |       | <0.001   |
|                 | 231.14930              | 6.879                   | C <sub>12</sub> H <sub>22</sub> O <sub>4</sub>    | Dodecanedioic acid                       |       | 0.001    |

12 Supplementary Table 3. Characteristics of identified metabolites in compare FOD, FO and CO groups.

13 FC: Fold change; PG: phosphatidyl glycerol; THA: tetracosahexaenoic acid.

14

|     | Detected mass (m/z) | Retention time (min) | Formula                                          | Putative identification              | FC   | <i>p</i> |
|-----|---------------------|----------------------|--------------------------------------------------|--------------------------------------|------|----------|
| FOD | 373.27610           | 5.177                | C <sub>43</sub> H <sub>69</sub> O <sub>8</sub> P | PA (22:6/18:2)                       | 3.56 | 0.02     |
|     | 453.33180           | 5.216                | C <sub>27</sub> H <sub>44</sub> O <sub>3</sub>   | 1,25-dihydroxyvitamin D <sub>3</sub> | 5.02 | 0.001    |
|     | 307.22500           | 9.787                | C <sub>20</sub> H <sub>34</sub> O <sub>2</sub>   | ETA (C20:3, n-3)                     | 6.62 | <0.001   |
| FO  | 285.17750           | 10.115               | C <sub>16</sub> H <sub>28</sub> O <sub>4</sub>   | Tetranorprostanedioic acid           | 7.85 | <0.001   |
|     | 283.21990           | 10.78                | C <sub>18</sub> H <sub>34</sub> O <sub>2</sub>   | Octadecenoic acid                    | 7.11 | <0.001   |

15 Supplementary Table 4. Characteristics of identified metabolites between the baseline and endpoint of FOD and FO group. FC: Fold change; PA: phosphatidic acid; ETA:

16 eicosatrienoic acid.

17

| Abbreviation | English full name                    |
|--------------|--------------------------------------|
| FO + D       | Fish oil plus vitamin D group        |
| FO           | Fish oil group                       |
| CO           | Control group                        |
| NAFLD        | Nonalcoholic fatty liver disease     |
| ALT          | Alanine aminotransferase             |
| AST          | Aspartate aminotransferase           |
| ASV          | Amplicon Sequence Variants           |
| BMI          | Body mass index                      |
| CI           | Confidence interval                  |
| DHA          | Docosahexaenoic acid                 |
| EPA          | Eicosapentaenoic acid                |
| ETA          | Eicosatrienoic acid                  |
| FBG          | Fasting blood glucose                |
| FC           | Fold change                          |
| FGF-21       | Fibroblast growth factor-21          |
| GLM          | Generalized linear model             |
| HC           | Hip circumference                    |
| HDL-C        | High density lipoprotein cholesterol |
| HRP          | Horse radish peroxidase              |
| IL-1 $\beta$ | Interleukin 1 $\beta$                |

|               |                                                          |
|---------------|----------------------------------------------------------|
| IL-6          | Interleukin 6                                            |
| IR            | Insulin resistant                                        |
| LDL-C         | Low density lipoprotein cholesterol                      |
| n-3 PUFA      | n-3 polyunsaturated fatty acids                          |
| ORs           | Odds ratios                                              |
| OTU           | Operational taxonomic units                              |
| OPLS-DDA      | Orthogonal partial least-squares discrimination analysis |
| PA            | Phosphatidic acid                                        |
| PCR           | Polymerase Chain Reaction                                |
| PLSDA         | Partial Least Squares Discriminant Analysis              |
| PUFA          | Polyunsaturated fatty acids                              |
| SD            | Standard deviation                                       |
| TAG           | Triglyceride                                             |
| TC            | Total cholesterol                                        |
| TNF- $\alpha$ | Tumour necrosis factor- $\alpha$                         |
| THA           | Tetracosahexaenoic acid                                  |
| UPLC          | Ultra Performance Liquid Chromatography                  |
| VDR           | Vitamin D receptor                                       |
| VIP           | Variable important in projection                         |
| WC            | Waist circumference                                      |
| WHR           | Waist hip ratio                                          |
