# Supplementary material for: Effects of dietary supplementation of fish oil plus vitamin D3 on gut microbiota and fecal metabolites, and their correlation with nonalcoholic fatty liver disease risk factors: a randomized controlled trial
Source: Royal Society of Chemistry journal article supplement (doi:10.1039/d3fo02319b), 2024-01-01
Supplement: d3fo02319b3.pdf [file d3fo02319b3.pdf]

## 1 DNA Extraction

2 The DNeasy PowerSoil Kit (QIAGEN, Inc., Netherlands) was used to extract total  
3 genomic DNA samples, in accordance with the manufacturer's instruction stored at -20  
4 °C prior to further analysis. The quantity and quality of extracted DNAs were measured  
5 using a NanoDrop NC2000 spectrophotometer (Thermo Fisher Scientific, Waltham,  
6 MA, USA) and agarose gel electrophoresis, respectively.

7

## 8 16S rRNA sequencing

9 Polymerase chain reaction (PCR) was used for V3-V4 hypervariable regions of 16S  
10 rRNA gene amplification with the primers of 338F (5'-  
11 ACTCCTACGGGAGGCAGCA-3') and 806R (5'-GGACTACHVGGGTWTCTAAT-  
12 3'). Sample-specific 7-bp barcodes were incorporated into the primers for multiplex  
13 sequencing. The PCR components contained 5µl of buffer (5×), 0.25µl of Fast pfu DNA  
14 Polymerase (5 U/µl), 2µl (2.5 mM) of dNTPs, 1µl (10uM) of each Forward and Reverse  
15 primer, 1µl of DNA Template, and 14.75µl of ddH<sub>2</sub>O. Thermal cycling consisted of  
16 initial denaturation at 98 °C for 5 min, followed by 25 cycles consisting of denaturation  
17 at 98 °C for 30 s, annealing at 53 °C for 30 s, and extension at 72 °C for 45s, with a  
18 final extension of 5 min at 72 °C. PCR amplicons were purified with Vazyme  
19 VAHTSTM DNA Clean Beads (Vazyme, Nanjing, China) and quantified using the  
20 Quant-iT PicoGreen dsDNA Assay Kit (Invitrogen, Carlsbad, CA, USA). After the  
21 individual quantification step, amplicons were pooled in equal amounts, and pair-end  
22 2×250 bp sequencing was performed using the Illumina MiSeq platform with MiSeq  
23 Reagent Kit v3 at Shanghai Personal Biotechnology Co., Ltd (Shanghai, China).

24

## 25 Metabolite Analysis and Identification

26 Ultraperformance liquid chromatography to quadrupole time-of-flight mass  
27 spectrometry (UPLC-Q-TOF-MS) approach was applied to identify the fecal  
28 metabolites. All experiments were performed on ice. Sample treated method: 100 mg  
29 feces were put into the homogenization tube, added three 1.5 mm zirconium beads and  
30 500µL precooled extract (methanol: ultrapure water = 1:1). The mixtures were

31 homogenized three times (6000 rpm, 30 s each time, and 10 s apart), and centrifuged at  
32 12,000 rpm at 4 °C for 15 min. The supernatant was collected and added 500µL  
33 precooled extract to repeat extraction once. The combined the supernatant was  
34 centrifuged and transferred into liquid phase vial.

35

36 We took 10µL from each sample as quality control (QC) sample. Before sample testing,  
37 QC sample was continuously tested for 10 times and analyzed. If the instrument had  
38 good repeatability and high stability, the samples were conducted to be tested. The QC  
39 sample was tested every 10 target samples during the analysis process.

40

41 The screening process of differential fecal metabolites was as follows: First, the  
42 metabolites with fold change  $> 2$  or  $< 0.5$  were screened. Then, metabolites with  
43 variable importance in projection (VIP)  $> 2$  were identified to be analyzed. Finally,  
44 Wilcoxon rank-sum test was used to compare the fold change between two groups, and  
45 Kruskal-Wallis was implemented to compare the fold changes between groups to find  
46 the significantly changed features. A two tailed  $p < 0.05$  was regarded as statistical  
47 difference.

48

49 To identify potential biomarkers, Human Metabolome Database (HMDB)  
50 (<http://hmdb.ca/>), Metlin (<http://metlin.scripps.edu/index.php>) and ChemSpider  
51 (<http://cssp.chemspider.com/>) was searched. The search criteria were average m/z  
52 value. Metabolite set enrichment and pathway analyses were based on MetaboAnalyst  
53 ([www.meta-boanalyst.ca](http://www.meta-boanalyst.ca)).

54
